# Supplementary material
Source: publisher figshare collection journal article supplement (https://gsapubs.figshare.com/ndownloader/files/22758056)
Supplement: Supplementary file 1 [file 22758056]

## Appendix: SAMPLING AND METHODS

Along with other minerals and alloys, the sample of this study was handpicked from a heavy mineral separate processed from 1500 kg of massive chromitite collected from orebody #31 of the Luobusa massif. Mineral separation was carried out at the Institute of Mineral Separation and Utilization in Zhengzhou, China, after careful cleaning of all equipment and first processing a 200-kg sample of granite as a blank.

Individual minerals were identified by optical techniques, followed by combination of scanning electron microscopy (SEM), energy dispersive X-ray spectroscopy (EDS), electron probe microanalysis (EPMA; including single spot analyses and elemental mapping).

The compositions of small grains were determined using an S-350N Hitachi SEM equipped with an Oxford INCA EDS at the Beijing Institute of Mining and Smelting and JEOL-ISM-5610 LV at Institute of Geology of the Chinese Academy of Geological Sciences, both at 20 kV.

The compositions of larger grains were determined using an EPMA-1600 electron microprobe operated at 15 kV and 0.01  $\mu\text{A}$ , with a sample current 0.009  $\mu\text{A}$ , using standards of quartz, kyanite, almandine garnet, plagioclase and microcline at the Geological University of Beijing.

Raman spectra were acquired using a Renishaw RM-2000 instrument at the Key Laboratory for Continental Dynamics, Institute of Geology of the Chinese Academy of Geological Sciences, Beijing, with a confocal microscope and a 50x lens objective, giving a 1  $\mu\text{m}$  sample footprint at the specimen. The laser excitation was achieved using an argon ion laser providing radiation of wavelength 514.5 nm and spectra were recorded at 2  $\text{cm}^{-1}$  resolution at several points on each measured grain in order to ensure representative signals from the heterogeneous area. Spectral accumulation times were of the order of 100 s. Specific minerals were identified in the Raman spectra based on comparison with Renishaw's Inorganic Materials and Minerals Database.

EBSM measurements: The crystallographic orientations of coesite were measured using a JEOL JSM-5610LV scanning electron microscope by electron backscatter diffraction (EBSD). The backscatter patterns were acquired at an accelerating voltage of 20 kV and a working distance of 20 mm. The photonic images were indexed by the CHANNEL5 software. The relative precision of crystal orientations measured from electron backscatter patterns is better than 1° (Krieger Lassen, 1996).

Table 2. Raman bands values occurred in spectra collected from kyanite and coesite

| Standard<br>Raman<br>bands<br>cm-1 | 950<br>900<br>298<br><br>Kyanite | 966<br>753<br>589<br><br>Stish | ?       | 521<br><br>Coes | 470<br>392<br>369<br><br>Qtz | 430 -<br>420<br><br>Rutile | 355<br><br>Coes | ?      | 271<br><br>Coes | 231<br><br>Stish | 176<br><br>Coes | ?<br>or<br>artefact |
|------------------------------------|----------------------------------|--------------------------------|---------|-----------------|------------------------------|----------------------------|-----------------|--------|-----------------|------------------|-----------------|---------------------|
| 74-3-2b                            |                                  |                                |         | 521             | 392.26                       |                            |                 | 317.39 | 296.68          | 229.77           |                 |                     |
| 74-3-2c                            |                                  |                                |         | 522             |                              |                            |                 |        | 274             |                  | 180.39          | 151.7               |
| 74-3-3c                            |                                  |                                |         | 524.40          |                              |                            | 333.30          |        | 256             |                  |                 |                     |
| 74-3-6b                            |                                  |                                |         | 522.89          |                              |                            |                 |        |                 |                  |                 |                     |
| 74-3-27a                           | 946.64<br>890.88                 |                                |         | 521.3           |                              | 438                        |                 |        |                 |                  |                 |                     |
| 74-3-27b                           | 890.88<br>298                    | 729.99                         |         |                 | 484.66<br>392.26             |                            |                 |        |                 |                  |                 |                     |
| 74-3-28a                           |                                  |                                |         | 521.3           |                              |                            |                 |        | 269             |                  | 177.2           | 150                 |
| 74-3-30a                           |                                  |                                |         | 521.3           |                              |                            |                 |        |                 |                  |                 |                     |
| 74-3-31a                           |                                  |                                |         | 521.3           |                              |                            | 381.11          |        | 271.19          |                  | 180             | 154.9               |
| 74-3-32a                           |                                  |                                |         | 506             | 486.25                       |                            |                 |        |                 |                  | 175.6           |                     |
| 74-3-33a                           |                                  |                                |         | 524.48          |                              | 417                        |                 |        |                 | 218              |                 |                     |
| 74-3-34a                           |                                  |                                |         |                 |                              |                            |                 |        |                 |                  |                 |                     |
| 74-3-35a                           | 945<br>895                       | 962.57<br>725<br>583           | 570     | 521             | 484.66                       | 428                        | 357             |        | 271             |                  | 177             |                     |
| 74-3-36a                           |                                  |                                |         | 522.89          |                              |                            |                 |        | 274.38          |                  |                 | 153.71              |
| 74-3-37a                           | 935.01<br>906.81                 |                                |         |                 |                              |                            |                 |        |                 |                  |                 |                     |
| 74-3-38a                           |                                  |                                |         | 524             |                              |                            |                 |        |                 |                  |                 |                     |
| 74-3-40a                           |                                  |                                |         | 521             |                              |                            |                 |        |                 |                  |                 |                     |
| 74-3-50a                           |                                  |                                | 710.87  |                 |                              |                            |                 |        |                 | 232              |                 |                     |
| 74-3-51a                           |                                  |                                | 685.38  | 524.48          |                              |                            | 334.9           |        |                 |                  |                 |                     |
| 74-3-52a                           | 946.64<br>900                    |                                | 564     | 526             | 486.25                       |                            | 322             |        |                 | 224.9            | 177             |                     |
| 74-3-53a                           |                                  |                                |         | 521.3           |                              |                            |                 |        |                 |                  |                 |                     |
| 74-3-54a                           |                                  |                                |         | 522.89          |                              |                            |                 |        |                 |                  |                 |                     |
| 74-3-55a                           |                                  |                                |         | 522.89          |                              |                            |                 |        | 285.53          |                  | 180.39          |                     |
| 74-3-56a                           | 949.82<br>889.29                 |                                |         | 521.3           | 487.84                       |                            |                 |        |                 |                  | 180.39          |                     |
| 74-3-69a                           | 959.38<br>898.85<br>299.87       |                                |         | 522.89          |                              |                            |                 |        |                 |                  | 181.99          |                     |
| 74-3-70a                           | 301.76                           |                                | 591.39? | 522.89          | 486.25                       | 425.72                     |                 | 323.76 | 263.23          |                  | 177.2           |                     |
| 74-3-71a                           | 953.01<br>898.85                 |                                |         | 522.89          | 486.25                       |                            |                 |        |                 |                  | 178.79          |                     |
| 74-3-78a                           |                                  |                                |         | 521.3           |                              | 427.31                     |                 |        |                 | 201.1            |                 |                     |
| 74-3-79a                           |                                  |                                |         | 521.3           |                              |                            |                 |        | 277.56          |                  |                 |                     |
| 74-3-80a                           |                                  |                                |         | 521.3           | 467.13<br>369.96             |                            | 346.06          |        | 271.19          |                  | 175.61          |                     |
| 74-3-81a                           |                                  |                                |         | 522.89          |                              |                            | 354.03          | 315.8  | 271.19          |                  | 177.2           |                     |
| 74-3-82a                           |                                  |                                |         | 522             | 486.25                       |                            |                 |        | 299.87          |                  | 178.79          |                     |
| 74-3-83                            |                                  |                                |         | 519.7           |                              |                            | 346.06          |        | 272.78          |                  | 175.61          |                     |

|          |                  |                            |        |        |        |        |        |  |                   |         |        |        |
|----------|------------------|----------------------------|--------|--------|--------|--------|--------|--|-------------------|---------|--------|--------|
|          |                  |                            |        |        |        |        |        |  |                   |         |        |        |
| 74-3-84a |                  |                            |        | 522.89 |        | 425.72 | 354.03 |  | 271.19            | 205.88? |        |        |
| 74-3-86a |                  |                            |        | 521.3  | 487.84 |        | 357.27 |  |                   |         | 178.79 |        |
| 74-3-87a | 892.48<br>491.03 |                            |        | 524.48 |        |        |        |  | 279.16            | 212.25  | 178.79 |        |
| 74-3-88a | 957.79<br>900.44 |                            |        | 522.89 | 486.25 | 428.9  | 358.81 |  | 272.78            |         | 178.79 |        |
| 74-3-89a | 957.79<br>900.44 | 698.12                     | 624.85 |        |        |        |        |  |                   | 232.96  |        |        |
| 74-3-90a | 967.35<br>903.03 | 734.76<br>715.65           |        | 522.89 | 483.06 |        |        |  |                   |         |        |        |
| 74-3-91a |                  |                            |        | 521.3  |        | 427.3  | 357.21 |  | 271.19            | 207.47  |        | 151.71 |
| 74-3-92a |                  |                            |        | 526.08 | 384.3? |        |        |  | 272.78            |         |        |        |
| 74-3-94a |                  |                            |        | 521.3  |        | 430.39 |        |  | 272.47            | 207.47  | 174.01 |        |
| 74-3-95a |                  | 796.89<br>694.94<br>610.51 |        | 522.89 |        |        |        |  |                   |         |        |        |
| 74-3-96a |                  |                            |        | 524.48 |        |        |        |  | 280.75?<br>261.63 |         | 175.61 |        |
| 74-3-97a | 299.87           |                            |        | 522.89 |        |        |        |  | 283.93            | 221.81  | 196.32 |        |
